# Supplementary material
Source: PubMed Central journal article supplement (PMC4141364)
Supplement: supp_db13-1607_DB131607SupplementaryData.pdf [file supp_db13-1607_DB131607SupplementaryData.pdf]

SUPPLEMENTARY DATA

**Supplementary Figure 1.** Distribution of Fluo-2 basal intensity values is similar in Con and ADCY5 *shRNA*-treated islets. The cumulative frequency of Fluo-2 intensity values (AU, arbitrary units) at 3 mM glucose is not significantly altered by ADCY5 knockdown ( $P > 0.05$ ; two-way ANOVA).

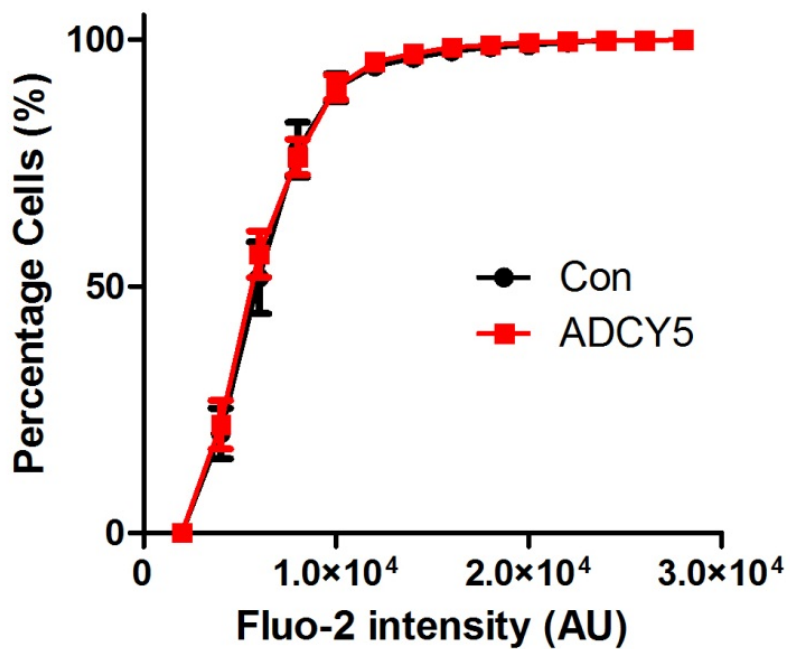

SUPPLEMENTARY DATA

**Supplementary Figure 2.** Donor age and BMI do not alter the magnitude suppression of glucose-stimulated insulin release following ADCY5-silencing. **(A)** Age of donors is not significantly correlated with the percentage suppression of insulin secretion in ADCY5-silenced islets ( $R^2 = 0.0001$ ; linear regression) ( $P$  values shown on graph). **(B)** As for (A) but BMI ( $R^2 = 0.05$ ; linear regression) ( $P$  values shown on graph).

**A**

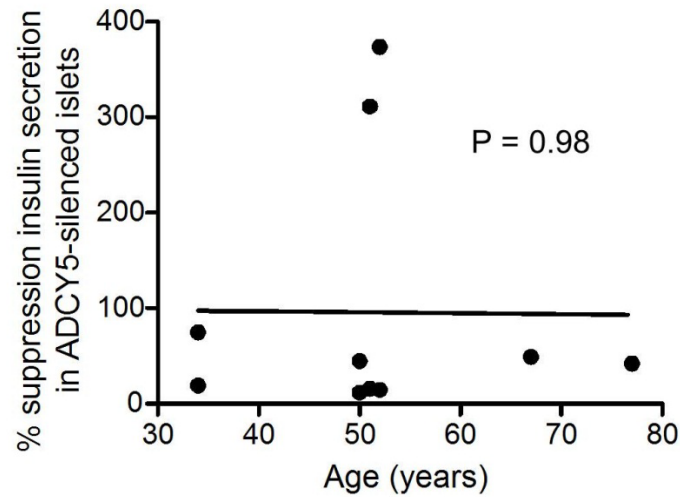

**B**

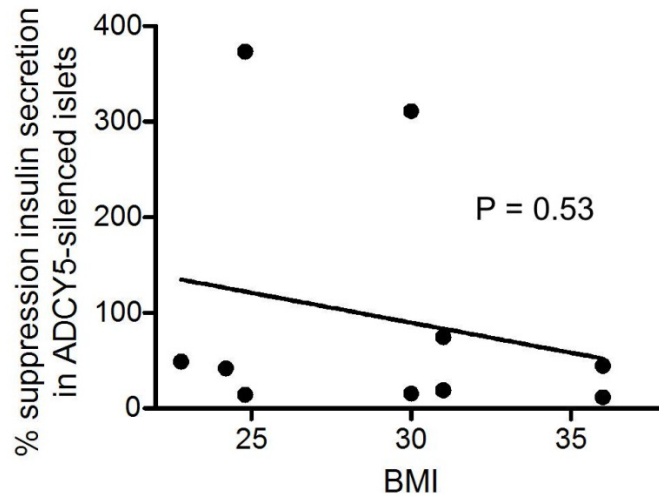

SUPPLEMENTARY DATA

**Supplementary Figure 3.** *ADCY5* silencing does not alter insulin granule distribution near the plasmamembrane. (A) TIRF imaging reveals similar insulin granule distribution in control (Con)- and shRNA-treated islets (scale bar 5  $\mu$ m). (B) Insulin granule:plasmamembrane (PM) ratio is unaffected by *ADCY5* silencing ( $n = 18$  cells from multiple islets from three donors).

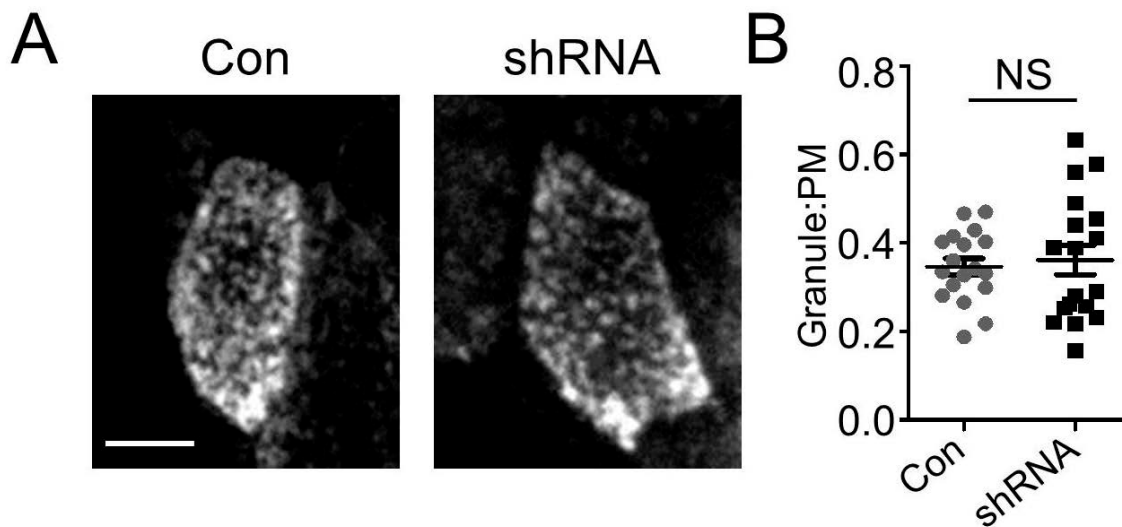

**Supplementary Figure 4.** *Epac2-camps* expression and localization in human islets. (A) Expression of the cAMP probe *Epac2-camps* is predominantly restricted to beta cells, as shown using immunohistochemistry with antibodies against insulin and glucagon (scale bar, 17.5  $\mu$ m).

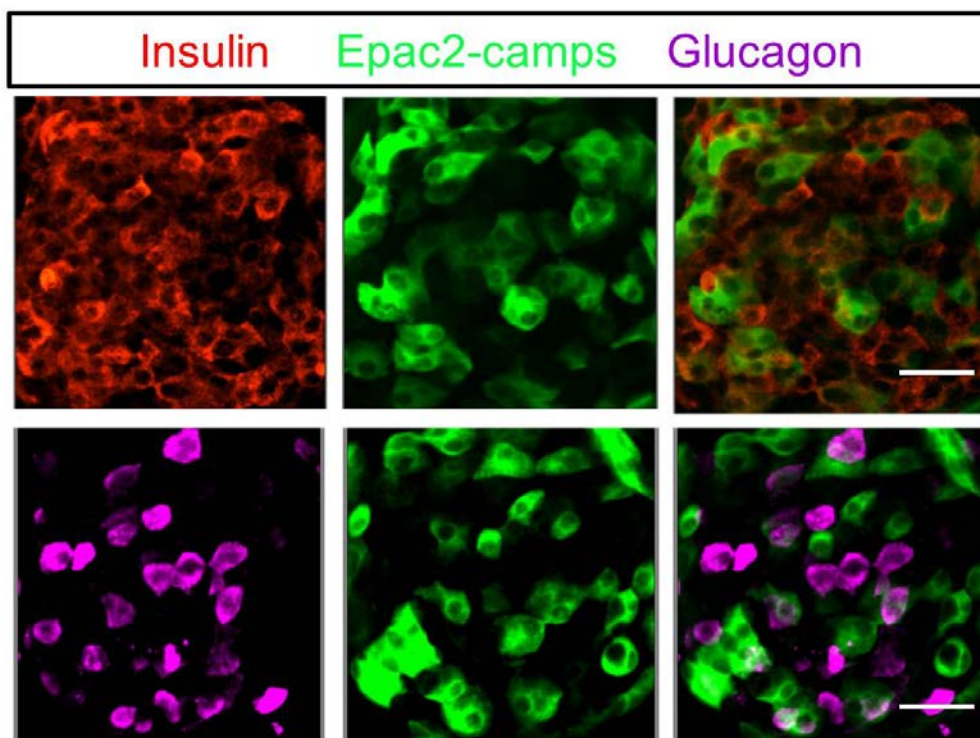

SUPPLEMENTARY DATA

**Supplementary Figure 5.** Effects of ADCY5-silencing can be mimicked using selective inhibitors of ADCY5 activity. (A) Co-infusion of NKY80 suppresses 11mM glucose (G11)-evoked cytosolic Ca<sup>2+</sup> rises (left panel; mean traces from a single donor), reducing both AUC and amplitude (right panel) (G3, 3 mM glucose) (\*\*P<0.01 versus Control (Con); Mann-Whitney U-test) (n = 6 recordings). (B) ADCY5-silencing does not significantly alter the suppressive effects of NKY80 on AUC and amplitude of Ca<sup>2+</sup> influx (NS, non-significant; Mann-Whitney U-test) (n = 4 recordings). Values represent mean ± SEM.

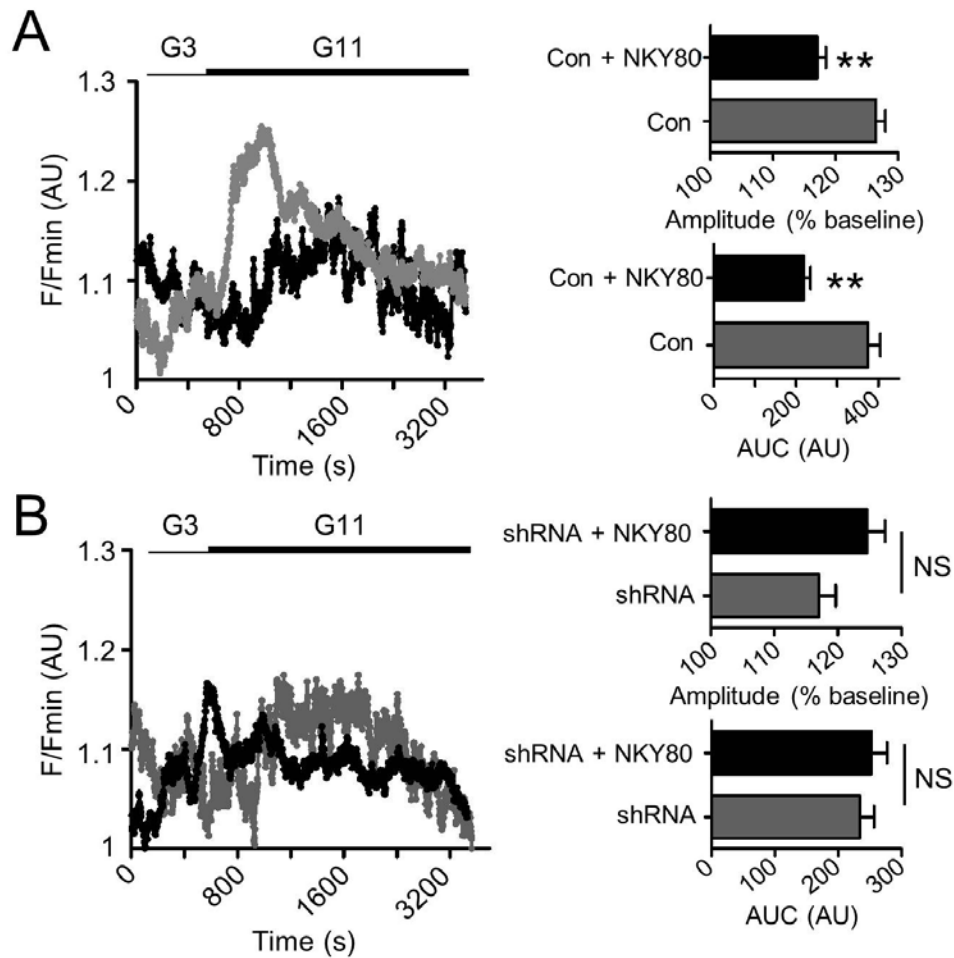

SUPPLEMENTARY DATA

**Supplementary Figure 6.** *ADCY5* does not alter  $Ca^{2+}$  responses to depolarisation. **(A)** KCl (30 mM) elicits similar responses in control (Con) and shRNA-treated islets (left panel, representative traces) (gray/black, raw; red, smoothed) (G3, 3 mM glucose) (NS, non-significant; Mann-Whitney U-test) ( $n = 4$  recordings). **(B)** As for (A) but in the continued presence of diazoxide (Dz) 500  $\mu$ M to limit complications arising from changes in plasma membrane potential ( $n = 10$  recordings). Values represent mean  $\pm$  SEM.

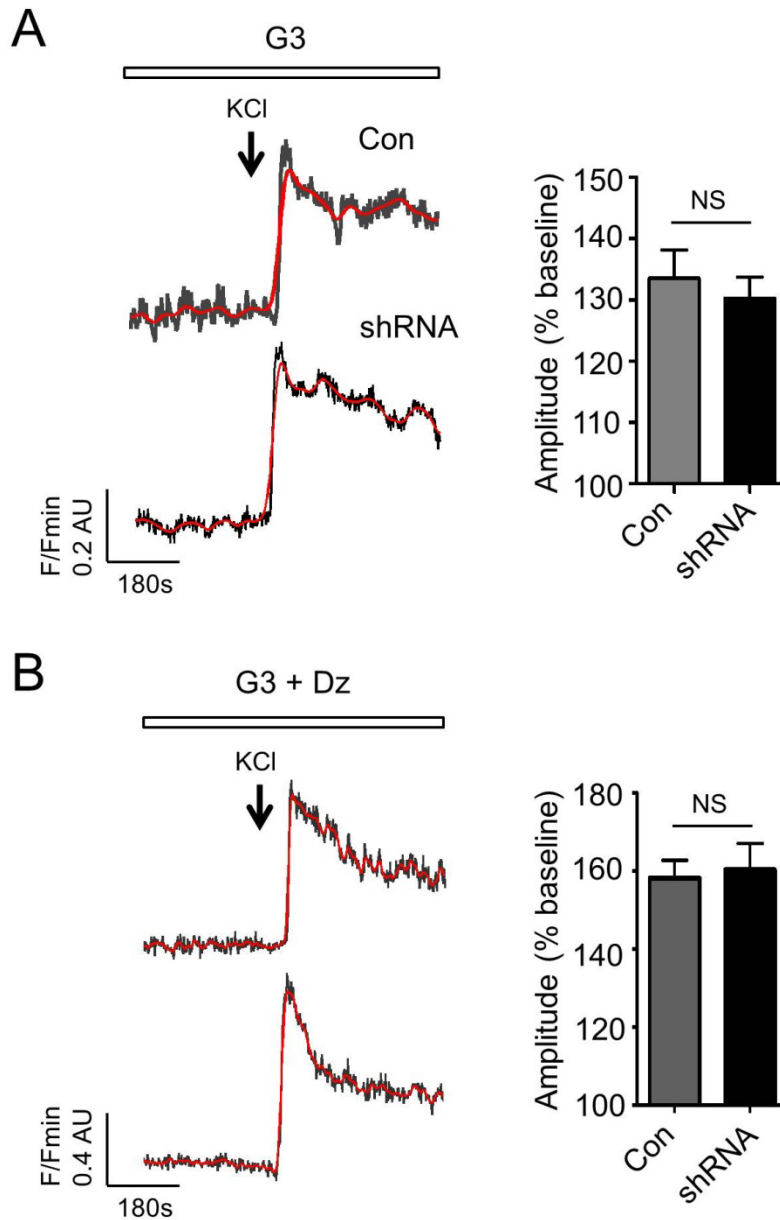

SUPPLEMENTARY DATA

**Supplementary Table 1.** *shRNA sequences against ADCY5.*

| Clone ID              | Sequence                                                   |
|-----------------------|------------------------------------------------------------|
| <b>TRCN0000078338</b> | CCGGCGCCATAGACTTCTTCAACAACTCGAGTTGTTGAAGAAGTCTATGGCGTTTTTG |
| <b>TRCN0000078339</b> | CCGGGCCGCAGAGAATCACTGTTTACTCGAGTAAACAGTGATTCTCTGCGGCTTTTTG |
| <b>TRCN0000078340</b> | CCGGGCTACACTCAACTACCTGAATCTCGAGATTCAGGTAGTTGAGTGTAGCTTTTTG |
| <b>TRCN0000078341</b> | CCGGTCTGTGATCTACTCCTGCGTACTCGAGTACGCAGGAGTAGATCACAGATTTTTG |
| <b>TRCN0000078342</b> | CCGGCAACGCCATAGACTTCTTCAACTCGAGTTGAAGAAGTCTATGGCGTTGTTTTG  |

**Supplementary Table 2.** *qRT-PCR primer sequences used for SYBR Green assays.*

| Gene                            | Forward Primer                     | Reverse Primer                     |
|---------------------------------|------------------------------------|------------------------------------|
| <b><i>GLP1R</i></b>             | 5' ACATCAAATGCAGACTTGCCA<br>3'     | 5' CCCAGCTCTTCCGAAATTCC 3'         |
| <b><i>ADCY5_human</i></b>       | 5'<br>CAGAAGCGGAAAGAAGAGAAGG<br>3' | 5'<br>CCAGAACTCATCCACTTCATCC<br>3' |
| <b><i>ADCY5_mouse</i></b>       | 5' GCCAATGCCATAGACTTCAG 3'         | 5' ATCTCCTCCTTCTCTTCTGTG 3'        |
| <b><i>ADCY6_human</i></b>       | 5' GGAAACTACAGGCAACAGGG<br>3'      | 5' GAGGCAAACATAACAGCCAC<br>3'      |
| <b><i>ADCY6_mouse</i></b>       | 5' TAAATGCCAGCACCTATGACC<br>3'     | 5'<br>TGTTCAACCCGATCTTCATCTG<br>3' |
| <b><i>ADCY8_human</i></b>       | 5' CCAATGACCATCCAGTTCTC 3'         | 5' GTGAAGACAAAGTACTCTGGG<br>3'     |
| <b><i>Cyclophilin(ppia)</i></b> | 5' AAGACTGAGTGGTTGGATGG 3'         | 5' ATGGTGATCTTCTTGCTGGT 3'         |

**Supplementary Table 3.** *qRT-PCR primers for eQTL.*

| Gene symbol  | Gene name            | Taqman accession | Location (exon boundary) |
|--------------|----------------------|------------------|--------------------------|
| <b>ADCY5</b> | Adenylate Cyclase 5  | Hs00766287_m1    | exon 16-17               |
| <b>TBP</b>   | TATA-binding protein | Hs00427620_m1    | exon 2-3                 |

SUPPLEMENTARY DATA

**Supplementary Table 4.** *Characteristics of donors used for eQTL analysis.*

| <b>Gender</b> | <b>Age<br/>(years)</b> | <b>BMI<br/>(kg/m<sup>2</sup>)</b> | <b>Genotype<br/>rs11708067</b> | <b>ADCY5/TBP<br/>Expression (2<sup>-</sup><br/>ΔCT)</b> |
|---------------|------------------------|-----------------------------------|--------------------------------|---------------------------------------------------------|
| M             | 47                     | 23.50                             | AA                             | 1.27                                                    |
| M             | 39                     | 32.60                             | AA                             | 1.03                                                    |
| M             | 67                     | 24.20                             | AA                             | 1.27                                                    |
| M             | 58                     | 27.80                             | AA                             | 0.98                                                    |
| M             | 59                     | 26.73                             | AA                             | 0.41                                                    |
| M             | 53                     | 27.77                             | AA                             | 2.18                                                    |
| M             | 61                     | 24.80                             | AA                             | 1.18                                                    |
| M             | 22                     | 19.60                             | AG                             | 1.22                                                    |
| M             | 56                     | 24.70                             | AG                             | 1.02                                                    |
| M             | 33                     | 21.80                             | AG                             | 2.43                                                    |
| M             | 66                     | 27.77                             | AG                             | 3.14                                                    |
| M             | 51                     | 26.23                             | AG                             | 1.39                                                    |
| M             | 52                     | 29.98                             | AG                             | 2.17                                                    |
| M             | 59                     | 27.68                             | AG                             | 3.33                                                    |
